# Supplementary material for: Global Mapping of DNA Methylation in Mouse Promoters Reveals Epigenetic Reprogramming of Pluripotency Genes
Source: PLoS Genet. 2008 Jun 27;4(6):e1000116. doi: 10.1371/journal.pgen.1000116 (PMC2432031; doi:10.1371/journal.pgen.1000116)
Supplement: Table S3 — Gene list of ES cell versus TS cell comparison. (0.03 MB XLS) [file pgen.1000116.s004.xls]

## Sheet: Sheet1
Table S3	Gene list of ES cell versus TS cell comparison
Chromosome	Start	End	No. Probes	CpG	Gene	Log2(TS)	Log2(R1)
8	23245470	23246250	11	0.0362056	NM_026931	0.132199	-0.0696546
11	95989010	95989310	5	0.0643729	Hoxb4	0.126511	-0.0632221
11	58551774	58552004	6	0.0361011	NM_022423	0.120619	-0.0621388
11	117282235	117282355	5	0.0416089	Q8CEL9	0.113158	-0.0790271
16	32778473	32779033	5	0.0585702	Lrch3	0.113022	-0.0631953
6	85383247	85383917	7	0.0409127	Spr	0.112009	-0.0627124
2	130654819	130655129	5	0.0658617	Atrn	0.110806	-0.197929
11	78034752	78035392	9	0.0290089	Slc13a2	0.109431	-0.0609687
11	69471507	69471977	5	0.0392157	Tnk1	0.105907	-0.101335
1	181010978	181011818	7	0.037474	Leftb	0.105601	-0.141097
4	127994497	127994937	5	0.0441883	NM_025455	0.105277	-0.0666963
6	113962402	113962902	8	0.0799273	NM_026365	0.104357	-0.052208
11	79693742	79694322	6	0.088061	Crlf3	0.103218	-0.0553537
6	39519589	39520339	8	0.0814212	Ndufb2	0.103004	-0.114871
1	133808730	133809420	10	0.0216886	Prelp	0.102935	-0.0547085
15	79400902	79401352	5	0.0418649	Eif3s6ip	0.102858	-0.0598624
11	5698632	5699282	10	0.0223821	Pgam2	0.102856	-0.156016
5	62787799	62788249	6	0.0608944	Tbc1d1	0.102282	-0.0494257
14	3088193	3088768	10	0.0595238	NM_025940	0.10163	-0.147946
17	27283765	27284262	5	0.0418944	Slc26a8	0.0999831	-0.056448
8	79663713	79664043	5	0.0644468	Gypa	0.099976	-0.0692845
8	122877933	122878303	5	0.0741504	Tubb3	0.0995025	-0.0530145
15	55486194	55486794	7	0.0649459	Col14a1	0.0988376	-0.121102
6	73092959	73093299	7	0.0255048	Kcmf1	0.0977098	-0.0735493
11	120222352	120222822	7	0.0485528	Q9D119	0.0974673	-0.0545913
10	77043358	77043798	6	0.0576369	NM_009929	0.0959916	-0.0632511
18	36790970	36791400	5	0.0523763	Q8K353	0.0939489	-0.140483
4	34975036	34975396	6	0.0520291	Q8CGI6	0.0935688	-0.117395
6	116653526	116654026	5	0.0781108	Q80ZS6	0.0923288	-0.0563729
11	70151940	70152420	7	0.0684551	Pld2	0.0911159	-0.117026
1	12817514	12818074	11	0.0327304	Sulf1	0.0907763	-0.0795164
8	121424759	121425149	5	0.0524722	Banp	0.0903966	-0.0722302
11	3542342	3542882	8	0.022787	Q8CI88	0.0903227	-0.0738724
7	96764611	96765191	8	0.0270957	NM_181853	0.0895383	-0.0632952
3	88408268	88408768	5	0.030881	Mrpl24	0.0890642	-0.0731855
2	132435477	132435967	8	0.0623281	Q9D112	0.0878394	-0.09638
6	122037815	122038305	5	0.0311641	NM_175628	0.0871251	-0.0508856
6	121876217	121876967	10	0.0680977	Q80TJ8	0.0861075	-0.0952394
10	121383608	121383958	5	0.084122	Q8CCC3	0.0855752	-0.100273
11	51643201	51643691	7	0.0659945	Cdkl3	0.0851545	-0.10899
8	110359572	110360232	9	0.0777161	Aars	0.0851218	-0.0913307
8	95199923	95200423	8	0.0435967	NM_172758	0.0846317	-0.0710798
4	124631861	124632321	5	0.0452403	Trappc3	0.0835138	-0.0916296
18	21148886	21149246	5	0.049948	B4galt6	0.0833331	-0.0477904
11	62673337	62673827	5	0.0238313	ENSMUSG00000042189	0.0831842	-0.0593984
2	84930217	84930777	11	0.0310078	P2rx3 Ssrp1	0.0827085	-0.133303
9	98703669	98704319	12	0.0751399	Q9CWP9	0.0819668	-0.0517144
7	115474932	115475452	6	0.0285459	ENSMUSG00000042828	0.0816182	-0.052472
2	127538218	127538628	5	0.0573689	Nphp1	0.0815443	-0.117492
17	24723595	24724095	6	0.061762	AXN1_MOUSE	0.0808134	-0.0548243
10	117626138	117626948	9	0.0240964	Rap1b	0.080639	-0.0534184
8	24935664	24936134	6	0.076564	Thap1	0.0804226	-0.0976428
2	91530474	91530964	9	0.0256645	F2	0.0801859	-0.0857718
3	69562317	69562607	6	0.026936	Q9D2Y8	0.0779105	-0.0578909
1	10078271	10078631	7	0.0728408	NM_027033	0.0749773	-0.0270097
4	135506877	135507387	7	0.0828083	NM_198248	0.0746769	-0.0777954
8	83961074	83961609	7	0.0211268	Btbd14b D8Ertd812e	0.0745069	-0.144978
9	66756074	66756494	6	0.0372184	NM_175206	0.0745061	-0.0421294
10	76017609	76018119	11	0.0378038	Slc5a4a	0.0734461	-0.0778209
7	17262000	17262420	5	0.0685602	Dll3	0.0733998	-0.0879073
5	35813279	35813979	11	0.0415065	Evc Evc2	0.0720357	-0.0705066
2	180901415	180902145	9	0.0450789	Srms	0.0676792	-0.066168
2	65784058	65784428	7	0.0350154	TAI2_MOUSE	0.0656467	-0.0523415
18	13337752	13338082	6	0.0322234	Impact	0.0642555	-0.060565
4	132769488	132769798	6	0.0439078	Q8BWC4	0.0575937	-0.0937058
7	12989776	12990116	7	0.0467588	Zfp108	0.0528331	-0.0758834
4	45043752	45044142	5	0.0665994	Aldh1b1	0.0427323	-0.070886
2	103316219	103316549	5	0.0365199	Elf5	-0.148244	0.28445
4	135344193	135344633	8	0.0384246	C1qb	-0.176834	0.264148
5	126730624	126730994	7	0.030896	Gpr133	-0.238604	0.258318
